# Supplementary material for: Evaluation of Hypofractionated Radiation Therapy Use and Patient-Reported Outcomes in Men With Nonmetastatic Prostate Cancer in Australia and New Zealand
Source: PubMed Central journal article supplement (PMC8561328; doi:10.1001/jamanetworkopen.2021.29647), 2021-11-01
Supplement: jamanetwopen-e2129647-s001.pdf [file jamanetwopen-e2129647-s001.pdf]

## Supplemental Online Content

Pryor DI, Martin JM, Millar JL, et al. Evaluation of hypofractionated radiation therapy use and patient-reported outcomes in men with nonmetastatic prostate cancer in Australia and New Zealand. *JAMA Netw Open*. 2021;4(11):e2129647. doi:10.1001/jamanetworkopen.2021.29647

**eFigure 1.** Proportion of All Patients Receiving CRT Versus HRT per Six-month Interval, Overall and by NCCN Risk Group

**eFigure 2.** Funnel Plots by Clinician and Institution of Case Volume Versus Proportion HRT Treatment for Intermediate Risk Prostate Cancer in the Years 2018-19. Red Line = Mean, Dashed Line = One Standard Deviation. Minimum Five Patients per Clinician or Institution

**eFigure 3.** Violin Plot of EPIC-26 Domain Scores for Urinary Incontinence, Urinary Irritation/obstruction, Bowel Function, and Sexual Function by Radiation Therapy Schedule

**eTable 1.** Percentage Moderately Hypofractionated Radiation Therapy and 95% Exact Binomial Confidence Interval (CI) by Year and NCCN Risk Category

**eTable 2.** Percentage Moderately Hypofractionated Radiation Therapy and 95% Exact Binomial Confidence Interval (CI) by Year and Jurisdiction for NCCN Intermediate Risk Disease

**eTable 3.** Characteristics of Domain Specific Scores of EPIC-26 in the Sample

This supplemental material has been provided by the authors to give readers additional information about their work.

eFigure 1. Proportion of all patients receiving CRT versus HRT per six-month interval, overall and by NCCN risk group.

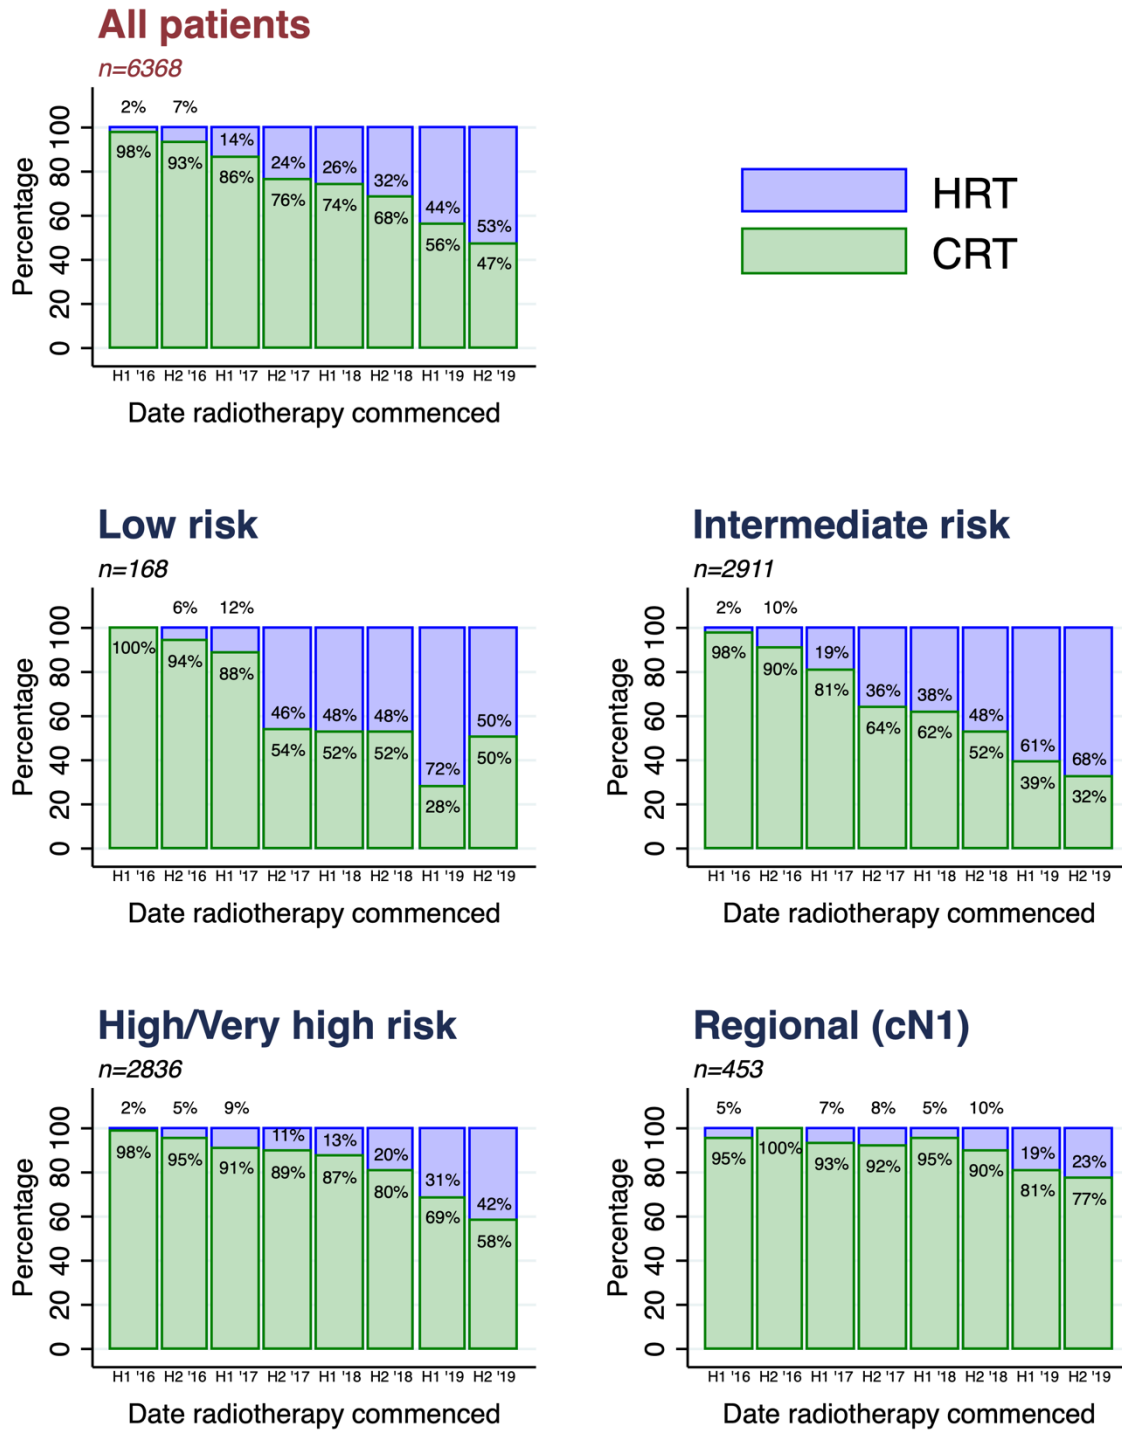

eFigure 2. Funnel plots by clinician and institution of case volume versus proportion HRT treatment for intermediate risk prostate cancer in the years 2018-19. Red line = mean, dashed line = one standard deviation. Minimum five patients per clinician or institution.

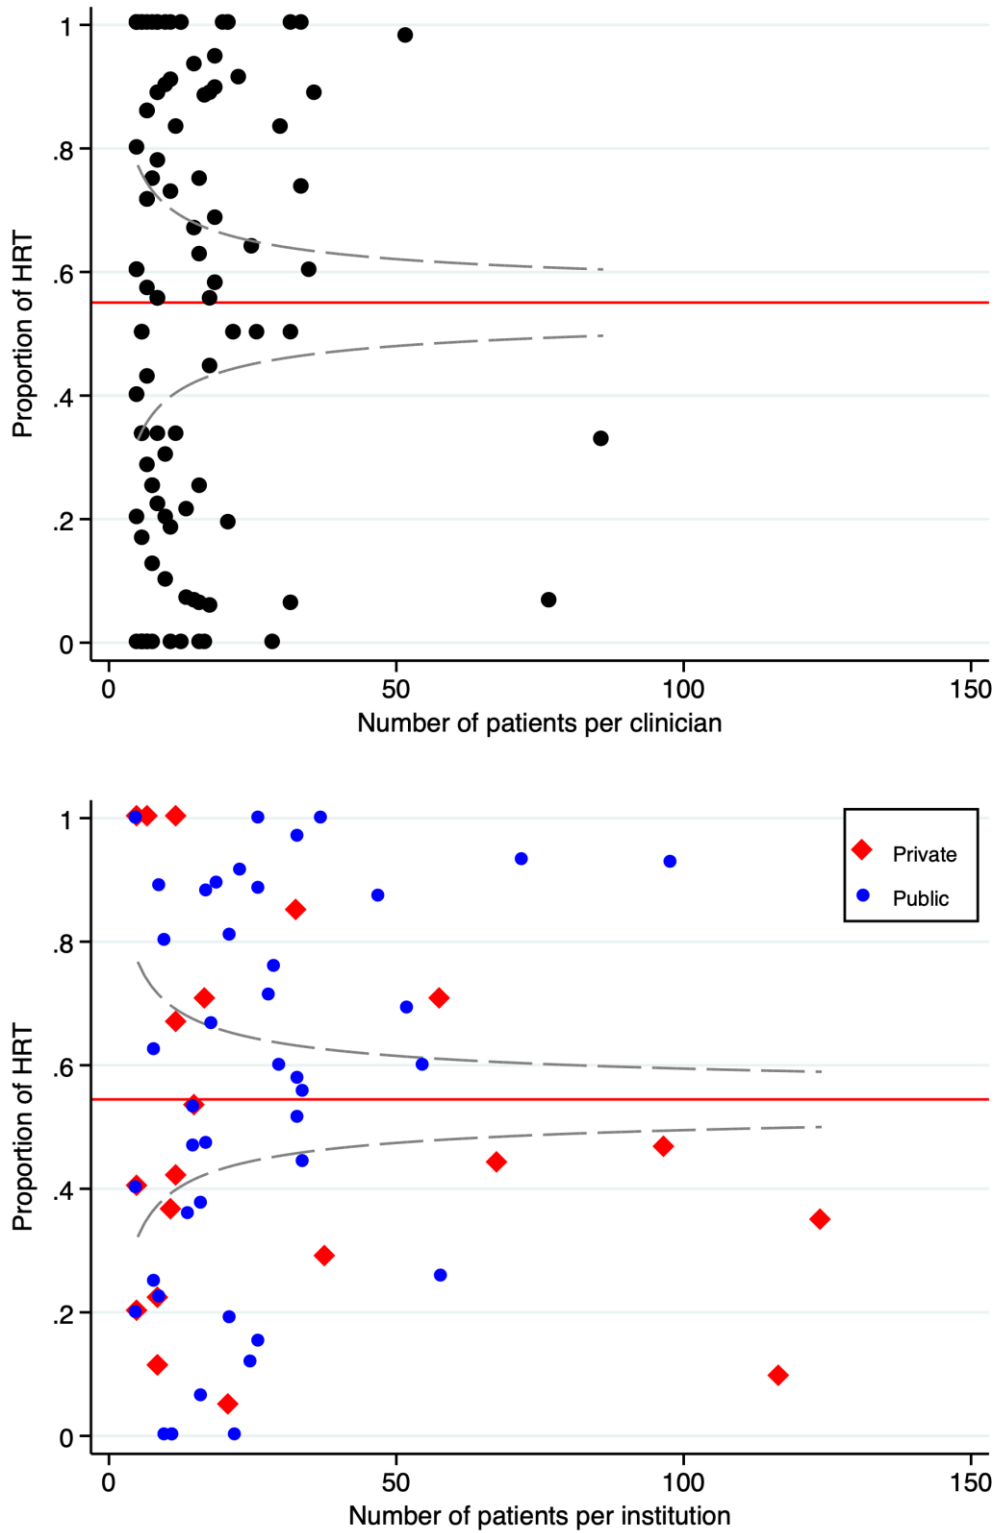

eFigure 3. Violin plot of EPIC-26 domain scores for urinary incontinence, urinary irritation/obstruction, bowel function, and sexual function by radiation therapy schedule.

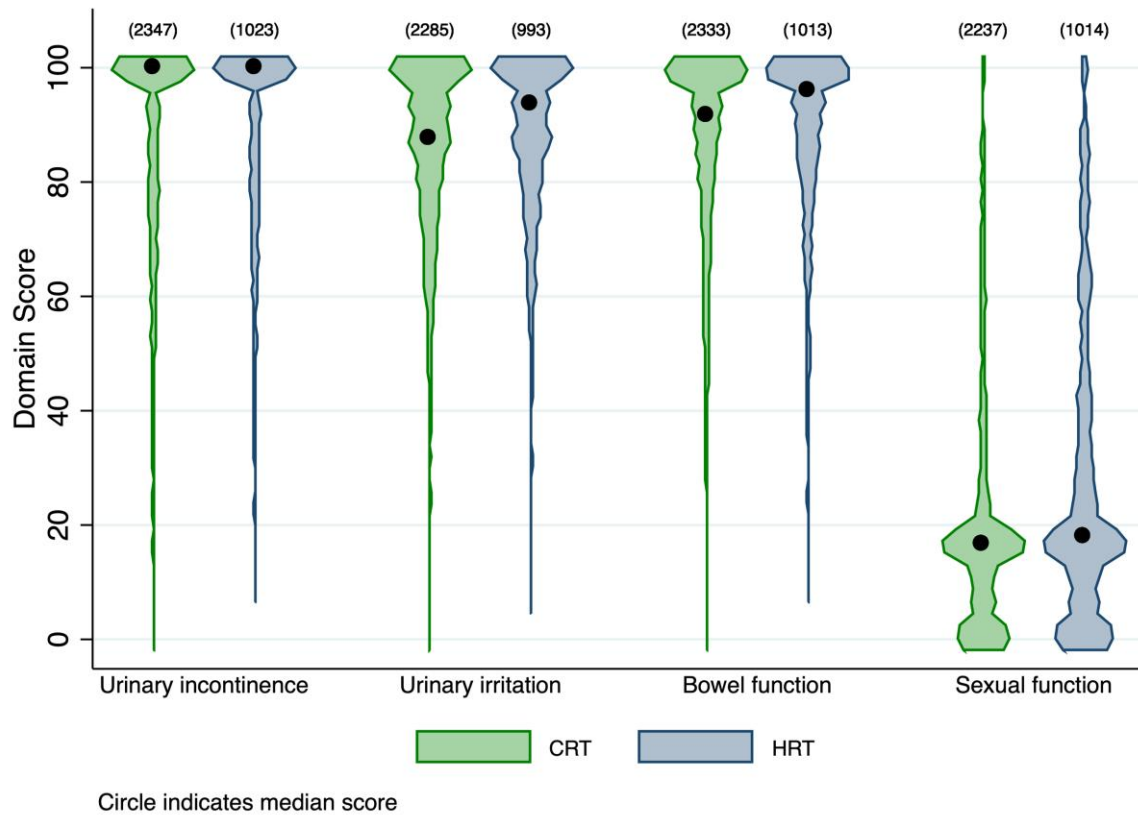

eTable 1. Percentage moderately hypofractionated radiation therapy and 95% exact binomial confidence interval (CI) by year and NCCN risk category.

| Year | All patients |                 | Low |              | Intermediate |                 | High / Very High |                 | Regional (cN1) |                |
|------|--------------|-----------------|-----|--------------|--------------|-----------------|------------------|-----------------|----------------|----------------|
|      | N            | % (CI)          | N   | % (CI)       | N            | % (CI)          | N                | % (CI)          | N              | % (CI)         |
| 2016 | 957          | 4.8 (3.4 – 6.2) | 30  | 3.3 (0 – 10) | 420          | 6.4 (4.1 – 8.8) | 463              | 3.7 (2.0 – 5.4) | 44             | 2.3 (0 – 6.9)  |
| 2017 | 1447         | 19 (17 – 21)    | 45  | 33 (19 – 48) | 667          | 29 (25 – 32)    | 645              | 10 (7.7 – 12)   | 90             | 7.8 (2.1 – 13) |
| 2018 | 1834         | 29 (27 – 31)    | 44  | 48 (32 – 63) | 863          | 43 (39 – 46)    | 798              | 17 (14 – 19)    | 129            | 7.8 (3.1 – 12) |
| 2019 | 2130         | 48 (46 – 50)    | 49  | 61 (47 – 75) | 961          | 64 (61 – 67)    | 930              | 36 (33 – 40)    | 190            | 21 (15 – 27)   |

eTable 2. Percentage moderately hypofractionated radiation therapy and 95% exact binomial confidence interval (CI) by year and jurisdiction for NCCN intermediate risk disease.

| Year | All patients |                 | NSW/ACT |               | Victoria |                 | Queensland |               | SA/NT |               | New Zealand |              |
|------|--------------|-----------------|---------|---------------|----------|-----------------|------------|---------------|-------|---------------|-------------|--------------|
|      | N            | % (CI)          | N       | % (CI)        | N        | % (CI)          | N          | % (CI)        | N     | % (CI)        | N           | % (CI)       |
| 2016 | 420          | 6.4 (4.1 – 8.8) | 101     | 15 (7.8 – 22) | 150      | 2.7 (0.1 – 5.3) | 94         | 5 (0.7 – 9.9) | 45    | 6.7 (0 – 14)  | 30          | 0            |
| 2017 | 667          | 29 (25 – 32)    | 212     | 37 (31 – 44)  | 208      | 21 (15 – 26)    | 117        | 21 (13 – 28)  | 77    | 23 (14 – 33)  | 53          | 53 (39 – 67) |
| 2018 | 863          | 43 (39 – 46)    | 223     | 52 (46 – 59)  | 243      | 45 (39 – 51)    | 186        | 26 (19 – 32)  | 105   | 12 (6.0 – 19) | 106         | 76 (68 – 85) |
| 2019 | 961          | 64 (61 – 67)    | 210     | 68 (61 – 74)  | 212      | 60 (54 – 67)    | 237        | 53 (47 – 60)  | 59    | 39 (26 – 52)  | 243         | 82 (77 – 87) |

eTable 3. Characteristics of domain specific scores of EPIC-26 in the sample.

| Domain               | Mean (SD)   | % minimum | % maximum | Cronbach's alpha |
|----------------------|-------------|-----------|-----------|------------------|
| Urinary Incontinence | 86.5 (19.6) | 0.1       | 53.2      | 0.82             |
| Urinary irritation   | 86.0 (15.7) | 0.1       | 32.5      | 0.64             |
| Bowel                | 86.8 (17.7) | 0.1       | 38.7      | 0.84             |
| Sexual               | 24.9 (25.1) | 17.1      | 1.3       | 0.88             |
